# Supplementary material for: Cross-Reactivity of Filariais ICT Cards in Areas of Contrasting Endemicity of Loa loa and Mansonella perstans in Cameroon: Implications for Shrinking of the Lymphatic Filariasis Map in the Central African Region
Source: PubMed Central journal article supplement (PMC4636288; doi:10.1371/journal.pntd.0004184), 2015-11-06
Supplement: pntd.0004184.s001.pdf [file pntd.0004184.s001.pdf]

| <b>Study sites</b> | <b>Health districts</b> | <b>IVM treatment year started</b> | <b>Number of round of IVM treatment before the study</b> | <b>Number of communities surveyed</b> |
|--------------------|-------------------------|-----------------------------------|----------------------------------------------------------|---------------------------------------|
| South-west 1       | Konye<br>Kumba          | 1999                              | 14                                                       | 6                                     |
| South-west 2       | Eyumodjock<br>Mamfe     | 2001                              | 12                                                       | 8                                     |
| North-west         | Nwa                     | 2004                              | 9                                                        | 10                                    |
| East               | Messamena               | 2005                              | 8                                                        | 11                                    |
|                    | Batouri                 | –                                 | 0                                                        | 7                                     |

IVM: ivermectin.
