# Supplementary material for: Cross-Reactivity of Filariais ICT Cards in Areas of Contrasting Endemicity of Loa loa and Mansonella perstans in Cameroon: Implications for Shrinking of the Lymphatic Filariasis Map in the Central African Region
Source: PubMed Central journal article supplement (PMC4636288; doi:10.1371/journal.pntd.0004184), 2015-11-06

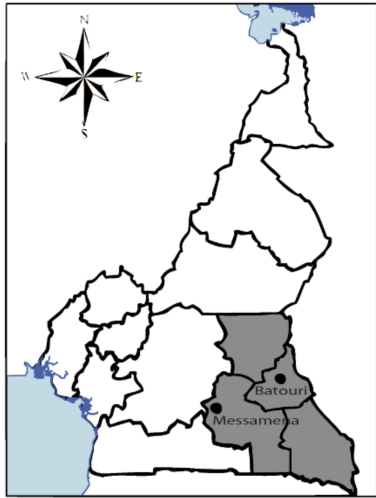

*L. loa* endemicity

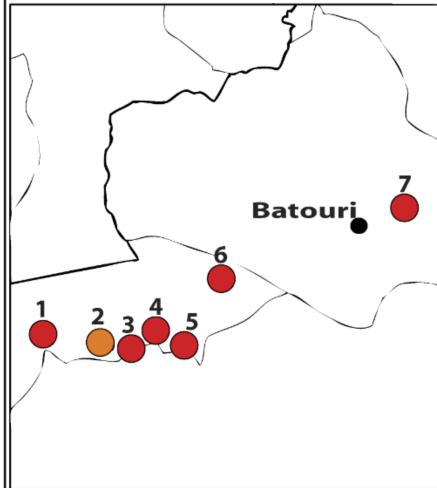

*M. perstans* endemicity

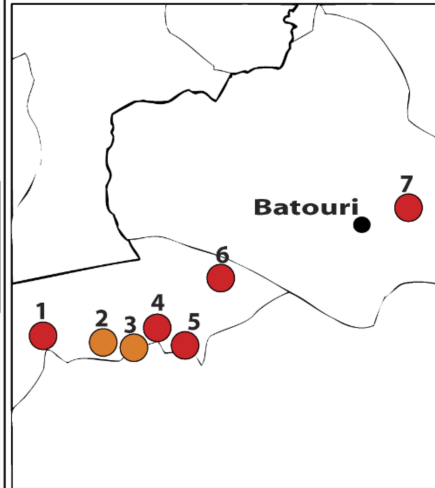

ICT card

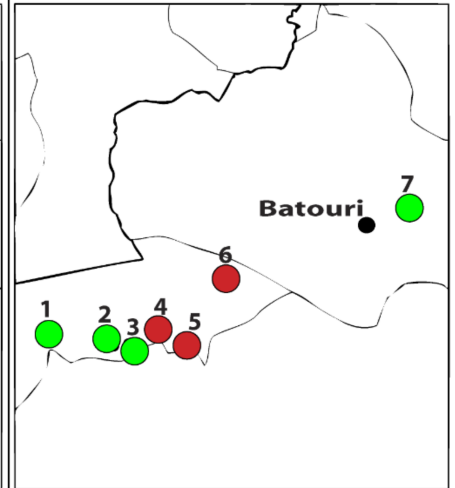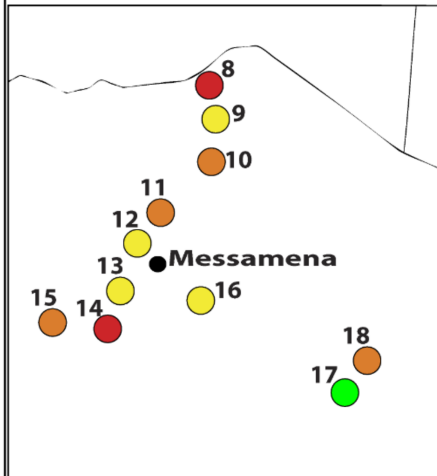

**Legend**

*L. loa* mf prevalence

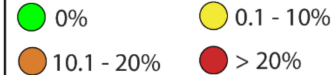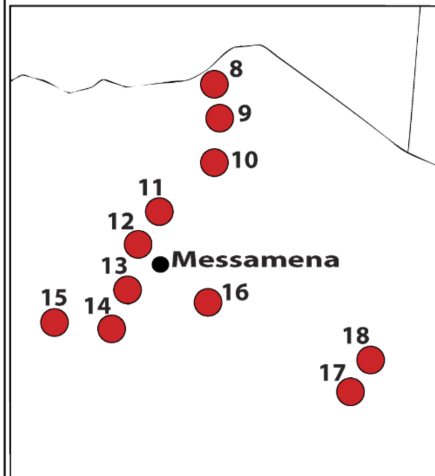

**Legend**

*M. perstans* mf prevalence

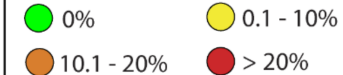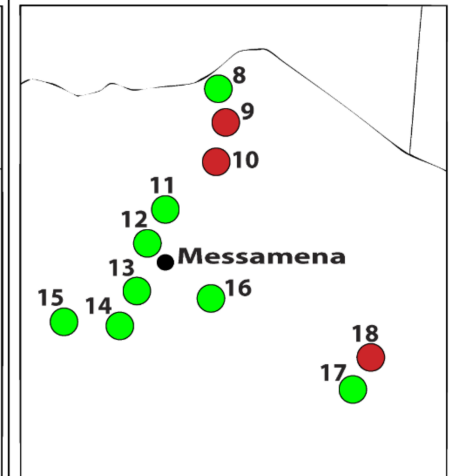

**Legend**

ICT prevalence

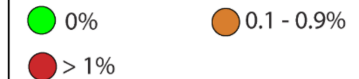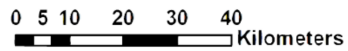

Supplement: pntd.0004184.s002.pdf [file pntd.0004184.s002.pdf]
